# Supplementary material
Source: PubMed Central journal article supplement (PMC1747794)
Supplement: tobcont_12_4_424__1.pdf [file tobcont_12_4_424__1.pdf]

**Table 1** Chemicals that have been reported to occur in cigarette smoke (listed alphabetically), with cancer classifications, cancer potency unit risk factors and non-cancer reference exposure levels

Table width=A

|    | <b>Chemical</b>                 | <b>IARC group*</b> | <b>Cal/EPA Cancer potency unit risk‡<br/>(<math>\mu\text{g}/\text{m}^3</math>)<sup>-1</sup></b> | <b>USEPA Cancer potency unit risk<br/>(<math>\mu\text{g}/\text{m}^3</math>)<sup>-1</sup></b> | <b>Non-cancer REL and target organ<br/>(<math>\mu\text{g}/\text{m}^3</math>)</b> | <b>Mainstream yields—ISO<br/>(<math>\mu\text{g}/\text{cigarette}</math>)</b> |
|----|---------------------------------|--------------------|-------------------------------------------------------------------------------------------------|----------------------------------------------------------------------------------------------|----------------------------------------------------------------------------------|------------------------------------------------------------------------------|
| 1  | 1-Aminonaphthalene <sup>3</sup> |                    |                                                                                                 |                                                                                              |                                                                                  | 0.0096                                                                       |
| 2  | 2-Aminonaphthalene <sup>3</sup> | 1                  | 5.14E-04                                                                                        |                                                                                              |                                                                                  | 0.007                                                                        |
| 3  | 3-Aminobiphenyl <sup>3</sup>    |                    |                                                                                                 |                                                                                              |                                                                                  | 0.0017                                                                       |
| 4  | 3-Ethenylpyridine <sup>13</sup> |                    |                                                                                                 |                                                                                              |                                                                                  | 662                                                                          |
| 5  | 4-Aminobiphenyl <sup>3</sup>    | 1                  | 6.00E-03                                                                                        |                                                                                              |                                                                                  | 0.0012                                                                       |
| 6  | Acetaldehyde <sup>3</sup>       | 2B                 | 2.70E-06                                                                                        | 2.20E-06                                                                                     | 9 (resp)                                                                         | 680                                                                          |
| 7  | Acetamide <sup>14</sup>         | 2B                 | 2.00E-05                                                                                        |                                                                                              |                                                                                  | 47                                                                           |
| 8  | Acetic acid <sup>14</sup>       |                    |                                                                                                 |                                                                                              |                                                                                  | 550                                                                          |
| 9  | Acetone <sup>3</sup>            |                    |                                                                                                 |                                                                                              |                                                                                  | 287                                                                          |
| 10 | Acrolein <sup>3</sup>           | 3                  |                                                                                                 |                                                                                              | 0.02<br>(resp/eye)                                                               | 68.8                                                                         |
| 11 | Acrylonitrile <sup>3</sup>      | 2B                 | 2.90E-04                                                                                        | 6.80E-05                                                                                     | 2 (resp)                                                                         | 8.9                                                                          |
| 12 | Ammonia <sup>3</sup>            |                    |                                                                                                 |                                                                                              | 100 (resp)                                                                       | 12.2                                                                         |
| 13 | Aniline <sup>14</sup>           | 3                  |                                                                                                 |                                                                                              | 1 (immune)                                                                       | 0.25                                                                         |

| <b>Chemical</b> | <b>IARC<br/>group*</b>          | <b>Cal/EPA<br/>Cancer<br/>potency unit<br/>risk‡<br/>(<math>\mu\text{g}/\text{m}^3</math>)<sup>-1</sup></b> | <b>USEPA<br/>Cancer<br/>potency unit<br/>risk<br/>(<math>\mu\text{g}/\text{m}^3</math>)<sup>-1</sup></b> | <b>Non-cancer<br/>REL and<br/>target<br/>organ<br/>(<math>\mu\text{g}/\text{m}^3</math>)</b> | <b>Mainstream<br/>yields—ISO<br/>(<math>\mu\text{g}/\text{cigarette}</math>)</b> |                                             |
|-----------------|---------------------------------|-------------------------------------------------------------------------------------------------------------|----------------------------------------------------------------------------------------------------------|----------------------------------------------------------------------------------------------|----------------------------------------------------------------------------------|---------------------------------------------|
| 14              | o-Anisidine <sup>14</sup>       | 2B                                                                                                          |                                                                                                          |                                                                                              |                                                                                  |                                             |
| 15              | Anthanthrene <sup>14</sup>      | 3                                                                                                           |                                                                                                          |                                                                                              | 0.012                                                                            |                                             |
| 16              | Anthracene <sup>14</sup>        | 3                                                                                                           |                                                                                                          |                                                                                              | 0.13                                                                             |                                             |
| 17              | Arsenic <sup>15</sup>           | 1                                                                                                           | 3.30E-03                                                                                                 | 4.30E-03                                                                                     | 0.03                                                                             | 0.7<br><br>(dev/card/ne<br>rv) CEPA<br>only |
| 18              | Benz[a]acridine <sup>14</sup>   | 3                                                                                                           |                                                                                                          |                                                                                              |                                                                                  |                                             |
| 19              | Benz[c]acridine <sup>14</sup>   | 3                                                                                                           |                                                                                                          |                                                                                              |                                                                                  |                                             |
| 20              | Benz(a)anthracene <sup>13</sup> | 2A                                                                                                          | 1.10E-04                                                                                                 |                                                                                              |                                                                                  | 0.045                                       |
| 21              | Benzene <sup>3</sup>            | 1                                                                                                           | 2.90E-05                                                                                                 | 7.80E-06                                                                                     | 60 (30)                                                                          | 46.3<br><br>(dev/card/ne<br>rv/immune)      |
| 22              | Benzo[a]fluorene <sup>14</sup>  | 3                                                                                                           |                                                                                                          |                                                                                              |                                                                                  | 0.11                                        |
| 23              | Benzo[b]fluorene <sup>14</sup>  | 3                                                                                                           |                                                                                                          |                                                                                              |                                                                                  | 0.02                                        |
| 24              | Benzo[c]fluorene <sup>14</sup>  | 3                                                                                                           |                                                                                                          |                                                                                              |                                                                                  |                                             |

| <b>Chemical</b>                            | <b>IARC<br/>group*</b> | <b>Cal/EPA<br/>Cancer<br/>potency unit<br/>risk‡<br/>(<math>\mu\text{g}/\text{m}^3</math>)<sup>-1</sup></b> | <b>USEPA<br/>Cancer<br/>potency unit<br/>risk<br/>(<math>\mu\text{g}/\text{m}^3</math>)<sup>-1</sup></b> | <b>Non-cancer<br/>REL and<br/>target<br/>organ<br/>(<math>\mu\text{g}/\text{m}^3</math>)</b> | <b>Mainstream<br/>yields—ISO<br/>(<math>\mu\text{g}/\text{cigarette}</math>)</b> |
|--------------------------------------------|------------------------|-------------------------------------------------------------------------------------------------------------|----------------------------------------------------------------------------------------------------------|----------------------------------------------------------------------------------------------|----------------------------------------------------------------------------------|
| 25                                         | 3                      |                                                                                                             |                                                                                                          |                                                                                              | 0.06                                                                             |
| Benzo[g,h,i]perylene <sup>1</sup><br>4     |                        |                                                                                                             |                                                                                                          |                                                                                              |                                                                                  |
| 26                                         | 3                      |                                                                                                             |                                                                                                          |                                                                                              |                                                                                  |
| Benzo[c]phenanthren<br>e <sup>14</sup>     |                        |                                                                                                             |                                                                                                          |                                                                                              |                                                                                  |
| 27                                         | 2A                     | 1.10E-03                                                                                                    |                                                                                                          |                                                                                              | 0.035                                                                            |
| 28                                         | 3                      |                                                                                                             |                                                                                                          |                                                                                              | 0.016                                                                            |
| 29                                         | 2B                     | 1.10E-04                                                                                                    |                                                                                                          |                                                                                              | 0.03                                                                             |
| Benzo(b)fluoranthene<br>14                 |                        |                                                                                                             |                                                                                                          |                                                                                              |                                                                                  |
| 30                                         | 2B                     | 1.10E-04                                                                                                    |                                                                                                          |                                                                                              | 0.06                                                                             |
| Benzo(j)fluoranthene <sup>1</sup><br>4     |                        |                                                                                                             |                                                                                                          |                                                                                              |                                                                                  |
| 31                                         | 2B                     | 1.10E-04                                                                                                    |                                                                                                          |                                                                                              | 0.009                                                                            |
| 32                                         | 3                      |                                                                                                             |                                                                                                          |                                                                                              | 0.0025                                                                           |
| Benzo[g,h,i]fluoranth<br>ene <sup>14</sup> |                        |                                                                                                             |                                                                                                          |                                                                                              |                                                                                  |

| <b>Chemical</b>                                 | <b>IARC group*</b> | <b>Cal/EPA Cancer potency unit risk‡<br/>(<math>\mu\text{g}/\text{m}^3</math>)<sup>-1</sup></b> | <b>USEPA Cancer potency unit risk<br/>(<math>\mu\text{g}/\text{m}^3</math>)<sup>-1</sup></b> | <b>Non-cancer REL and target organ<br/>(<math>\mu\text{g}/\text{m}^3</math>)</b> | <b>Mainstream yields—ISO<br/>(<math>\mu\text{g}/\text{cigarette}</math>)</b> |
|-------------------------------------------------|--------------------|-------------------------------------------------------------------------------------------------|----------------------------------------------------------------------------------------------|----------------------------------------------------------------------------------|------------------------------------------------------------------------------|
| 33 Beryllium <sup>15</sup>                      | 1                  | 2.40E-03                                                                                        | 2.40E-03                                                                                     |                                                                                  | 0.00025                                                                      |
| 34 Bicyclohexyl <sup>14</sup>                   |                    |                                                                                                 |                                                                                              |                                                                                  |                                                                              |
| 35 1,3 – Butadiene <sup>3</sup>                 | 2A                 | 1.70E-04                                                                                        | 3.00E-05                                                                                     | 8                                                                                | 35.5<br>(repro/dev)                                                          |
| 36 Butyraldehyde <sup>3</sup>                   |                    |                                                                                                 |                                                                                              |                                                                                  | 32.4                                                                         |
| 37 Butyrolactone <sup>14</sup>                  | 3                  |                                                                                                 |                                                                                              |                                                                                  | 10                                                                           |
| 38 Cadmium <sup>3</sup>                         | 1                  | 4.20E-03                                                                                        | 1.80E-03                                                                                     | 0.01                                                                             | 0.103<br>(kidney/resp<br>)                                                   |
| 39 Captan <sup>14</sup>                         | 3                  |                                                                                                 |                                                                                              |                                                                                  | 17                                                                           |
| 40 Carbazole <sup>14</sup>                      | 3                  |                                                                                                 |                                                                                              |                                                                                  | 1                                                                            |
| 41 Carbon Monoxide <sup>3,17,18</sup>           |                    |                                                                                                 |                                                                                              | 10,000                                                                           | 13,609<br>(card)                                                             |
| 42 Catechol <sup>3</sup>                        | 2B                 |                                                                                                 |                                                                                              |                                                                                  | 88.2                                                                         |
| 43 Chlorinated dioxins and furans <sup>9§</sup> | 1                  | 3.7E+01                                                                                         |                                                                                              | 0.00004                                                                          | 0.000001<br>(dev/immun<br>e/resp/end/al<br>imentary)                         |

| <b>Chemical</b>                           | <b>IARC<br/>group*</b> | <b>Cal/EPA<br/>Cancer<br/>potency unit<br/>risk‡<br/>(<math>\mu\text{g}/\text{m}^3</math>)<sup>-1</sup></b> | <b>USEPA<br/>Cancer<br/>potency unit<br/>risk<br/>(<math>\mu\text{g}/\text{m}^3</math>)<sup>-1</sup></b> | <b>Non-cancer<br/>REL and<br/>target<br/>organ<br/>(<math>\mu\text{g}/\text{m}^3</math>)</b> | <b>Mainstream<br/>yields—ISO<br/>(<math>\mu\text{g}/\text{cigarette}</math>)</b> |
|-------------------------------------------|------------------------|-------------------------------------------------------------------------------------------------------------|----------------------------------------------------------------------------------------------------------|----------------------------------------------------------------------------------------------|----------------------------------------------------------------------------------|
| 44 Cholesterol <sup>14</sup>              | 3                      |                                                                                                             |                                                                                                          |                                                                                              | 22                                                                               |
| 45 Chromium<br>(hexavalent) <sup>3</sup>  | 1                      | 1.50E-01                                                                                                    | 1.20E-02                                                                                                 | 0.0008<br>(resp)                                                                             | 0.0042                                                                           |
| 46 Chrysene <sup>13,14</sup>              | 3                      | 1.10E-05                                                                                                    |                                                                                                          |                                                                                              | 0.05                                                                             |
| 47 Coronene <sup>14</sup>                 | 3                      |                                                                                                             |                                                                                                          |                                                                                              | 0.001                                                                            |
| 48 Coumarin <sup>14</sup>                 | 3                      |                                                                                                             |                                                                                                          |                                                                                              |                                                                                  |
| 49 Crotonaldehyde <sup>3</sup>            | 3                      |                                                                                                             |                                                                                                          |                                                                                              | 14.2                                                                             |
| 50 Cyclohexane <sup>14</sup>              |                        |                                                                                                             |                                                                                                          |                                                                                              |                                                                                  |
| 51 Cyclopentane <sup>14</sup>             |                        |                                                                                                             |                                                                                                          |                                                                                              |                                                                                  |
| 52 DDT <sup>14</sup>                      | 2B                     | 9.71E-05                                                                                                    | 9.70E-05                                                                                                 |                                                                                              | 0.95                                                                             |
| 53 Dibenz(a,h)acridine <sup>13</sup>      | 2B                     | 1.10E-04                                                                                                    |                                                                                                          |                                                                                              | 0.0001                                                                           |
| 54 Dibenz(a,j)acridine <sup>13</sup>      | 2B                     | 1.10E-04                                                                                                    |                                                                                                          |                                                                                              | 0.0027                                                                           |
| 55<br>Dibenz[a,c]anthracene <sup>14</sup> | 3                      |                                                                                                             |                                                                                                          |                                                                                              |                                                                                  |
| 56<br>Dibenz(a,h)anthracen <sup>e13</sup> | 2A                     | 1.20E-03                                                                                                    |                                                                                                          |                                                                                              | 0.004                                                                            |

| <b>Chemical</b>                            | <b>IARC<br/>group*</b> | <b>Cal/EPA<br/>Cancer<br/>potency unit<br/>risk‡<br/>(<math>\mu\text{g}/\text{m}^3</math>)<sup>-1</sup></b> | <b>USEPA<br/>Cancer<br/>potency unit<br/>risk<br/>(<math>\mu\text{g}/\text{m}^3</math>)<sup>-1</sup></b> | <b>Non-cancer<br/>REL and<br/>target<br/>organ<br/>(<math>\mu\text{g}/\text{m}^3</math>)</b> | <b>Mainstream<br/>yields—ISO<br/>(<math>\mu\text{g}/\text{cigarette}</math>)</b> |
|--------------------------------------------|------------------------|-------------------------------------------------------------------------------------------------------------|----------------------------------------------------------------------------------------------------------|----------------------------------------------------------------------------------------------|----------------------------------------------------------------------------------|
| 57                                         | 3                      |                                                                                                             |                                                                                                          |                                                                                              | 0.01                                                                             |
| Dibenz[a,j]anthracene <sup>14</sup>        |                        |                                                                                                             |                                                                                                          |                                                                                              |                                                                                  |
| 58                                         | 2B                     | 1.10E-03                                                                                                    |                                                                                                          |                                                                                              | 0.0007                                                                           |
| 7H-Dibenzo(c,g)-carbazole <sup>13</sup>    |                        |                                                                                                             |                                                                                                          |                                                                                              |                                                                                  |
| 59                                         | 3                      |                                                                                                             |                                                                                                          |                                                                                              |                                                                                  |
| Dibenzo[a,e]fluoranthene <sup>14</sup>     |                        |                                                                                                             |                                                                                                          |                                                                                              |                                                                                  |
| 60                                         | 2B                     |                                                                                                             |                                                                                                          |                                                                                              |                                                                                  |
| Dibenzo[a,e]pyrene <sup>14</sup>           |                        |                                                                                                             |                                                                                                          |                                                                                              |                                                                                  |
| 61                                         | 2B                     | 1.10E-02                                                                                                    |                                                                                                          |                                                                                              | 0.0025                                                                           |
| Dibenzo(a,i)pyrene <sup>15,14</sup>        |                        |                                                                                                             |                                                                                                          |                                                                                              |                                                                                  |
| 62                                         | 2B                     | 1.10E-02                                                                                                    |                                                                                                          |                                                                                              |                                                                                  |
| Dibenzo(a,l)pyrene <sup>14</sup>           |                        |                                                                                                             |                                                                                                          |                                                                                              |                                                                                  |
| 63                                         |                        |                                                                                                             |                                                                                                          |                                                                                              |                                                                                  |
| Dimethylamine <sup>14</sup>                |                        |                                                                                                             |                                                                                                          |                                                                                              |                                                                                  |
| 64                                         | 2B                     |                                                                                                             |                                                                                                          |                                                                                              |                                                                                  |
| 1,1-Dimethylhydrazine <sup>14</sup>        |                        |                                                                                                             |                                                                                                          |                                                                                              |                                                                                  |
| 65                                         |                        |                                                                                                             |                                                                                                          |                                                                                              |                                                                                  |
| 2,3-Dimethylmaleic anhydride <sup>14</sup> |                        |                                                                                                             |                                                                                                          |                                                                                              |                                                                                  |

|    | <b>Chemical</b>                        | <b>IARC<br/>group*</b> | <b>Cal/EPA<br/>Cancer<br/>potency unit<br/>risk‡<br/>(<math>\mu\text{g}/\text{m}^3</math>)<sup>-1</sup></b> | <b>USEPA<br/>Cancer<br/>potency unit<br/>risk<br/>(<math>\mu\text{g}/\text{m}^3</math>)<sup>-1</sup></b> | <b>Non-cancer<br/>REL and<br/>target<br/>organ<br/>(<math>\mu\text{g}/\text{m}^3</math>)</b> | <b>Mainstream<br/>yields—ISO<br/>(<math>\mu\text{g}/\text{cigarette}</math>)</b> |
|----|----------------------------------------|------------------------|-------------------------------------------------------------------------------------------------------------|----------------------------------------------------------------------------------------------------------|----------------------------------------------------------------------------------------------|----------------------------------------------------------------------------------|
| 66 | 1,4-Dimethylphenanthrene <sup>14</sup> | 3                      |                                                                                                             |                                                                                                          |                                                                                              |                                                                                  |
| 67 | 2,5-Dimethylpyrazine <sup>14</sup>     |                        |                                                                                                             |                                                                                                          |                                                                                              | 11.2                                                                             |
| 68 | Endrin <sup>14</sup>                   | 3                      |                                                                                                             |                                                                                                          |                                                                                              |                                                                                  |
| 69 | Ethylamine <sup>14</sup>               |                        |                                                                                                             |                                                                                                          |                                                                                              | 1.2                                                                              |
| 70 | Ethylbenzene <sup>17</sup>             | 2B                     |                                                                                                             |                                                                                                          | 1000<br>(dev/aliment<br>/kidney)                                                             |                                                                                  |
| 71 | Ethylene <sup>14</sup>                 | 3                      |                                                                                                             |                                                                                                          |                                                                                              | 300                                                                              |
| 72 | Eugenol <sup>14</sup>                  | 3                      |                                                                                                             |                                                                                                          |                                                                                              | 3                                                                                |
| 73 | Fluoranthene <sup>14</sup>             | 3                      |                                                                                                             |                                                                                                          |                                                                                              | 0.18                                                                             |
| 74 | Fluorene <sup>14</sup>                 | 3                      |                                                                                                             |                                                                                                          |                                                                                              |                                                                                  |
| 75 | Formaldehyde <sup>3</sup>              | 2A                     | 6.00E-06                                                                                                    | 1.30E-05                                                                                                 | 2<br>(resp/eyes)                                                                             | 33.0                                                                             |
| 76 | Formic acid <sup>14</sup>              |                        |                                                                                                             |                                                                                                          |                                                                                              | 340                                                                              |
| 77 | Furfural <sup>14</sup>                 |                        |                                                                                                             |                                                                                                          |                                                                                              | 77                                                                               |

| <b>Chemical</b> | <b>IARC</b>                               | <b>Cal/EPA</b>                         | <b>USEPA</b>                           | <b>Non-cancer Mainstream</b> |                       |        |
|-----------------|-------------------------------------------|----------------------------------------|----------------------------------------|------------------------------|-----------------------|--------|
|                 | <b>group*</b>                             | <b>Cancer</b>                          | <b>Cancer</b>                          | <b>REL and</b>               | <b>yields—ISO</b>     |        |
|                 |                                           | <b>potency unit</b>                    | <b>potency unit</b>                    | <b>target</b>                | <b>(µg/cigarette)</b> |        |
|                 |                                           | <b>risk‡</b>                           | <b>risk</b>                            | <b>organ</b>                 |                       |        |
|                 |                                           | <b>(µg/m<sup>3</sup>)<sup>-1</sup></b> | <b>(µg/m<sup>3</sup>)<sup>-1</sup></b> | <b>(µg/m<sup>3</sup>)</b>    |                       |        |
| 78              | Hydrazine <sup>14</sup>                   | 2B                                     | 4.90E-03                               | 4.90E-03                     | 0.2                   | 0.034  |
|                 |                                           |                                        |                                        |                              | (aliment/end          | )      |
| 79              | Hydrogen cyanide <sup>3</sup>             |                                        |                                        |                              | 3 (card)              | 118.4  |
| 80              | Hydrogen sulphide <sup>16</sup>           |                                        |                                        |                              | 0.9 (resp)            |        |
| 81              | Hydroquinone <sup>3</sup>                 | 3                                      |                                        |                              |                       | 72.2   |
| 82              | Indeno(1,2,3-c,d)pyrene <sup>15, 14</sup> | 2B                                     | 1.10E-04                               |                              |                       | 0.012  |
| 83              | Isoprene <sup>3</sup>                     | 2B                                     |                                        |                              |                       | 264    |
| 84              | Lead <sup>3</sup>                         | 2B                                     | 1.20E-05                               |                              |                       | 0.0128 |
| 85              | m-+p-Cresol <sup>3</sup>                  |                                        |                                        |                              | 4 (card)              | 14     |
| 86              | Malathion <sup>14</sup>                   | 3                                      |                                        |                              |                       |        |
| 87              | Maleic hydrazide <sup>14</sup>            | 3                                      |                                        |                              |                       | 1.1    |
| 88              | Mercury <sup>3</sup>                      |                                        |                                        |                              | 0.3 (nerv)            | 0.0052 |
| 89              | Methanol <sup>14</sup>                    | 3                                      |                                        |                              |                       | 135    |
| 90              | Methyl acrylate <sup>14</sup>             | 3                                      |                                        |                              |                       |        |
| 91              | Methyl catechol <sup>14</sup>             |                                        |                                        |                              |                       | 38     |
| 92              | Methyl chloride <sup>14</sup>             |                                        |                                        |                              |                       | 495    |



| <b>Chemical</b> | <b>IARC</b>                        | <b>Cal/EPA</b>                         | <b>USEPA</b>                           | <b>Non-cancer</b>         | <b>Mainstream</b>     |
|-----------------|------------------------------------|----------------------------------------|----------------------------------------|---------------------------|-----------------------|
|                 | <b>group*</b>                      | <b>Cancer</b>                          | <b>Cancer</b>                          | <b>REL and</b>            | <b>yields—ISO</b>     |
|                 |                                    | <b>potency unit</b>                    | <b>potency unit</b>                    | <b>target</b>             | <b>(µg/cigarette)</b> |
|                 |                                    | <b>risk‡</b>                           | <b>risk</b>                            | <b>organ</b>              |                       |
|                 |                                    | <b>(µg/m<sup>3</sup>)<sup>-1</sup></b> | <b>(µg/m<sup>3</sup>)<sup>-1</sup></b> | <b>(µg/m<sup>3</sup>)</b> |                       |
| 93              | 1-Methylchrysene <sup>14</sup>     | 3                                      |                                        |                           | 0.003                 |
| 94              | 2-Methylchrysene <sup>14</sup>     | 3                                      |                                        |                           | 0.001                 |
| 95              | 3-Methylchrysene <sup>14</sup>     | 3                                      |                                        |                           | 0.006                 |
| 96              | 4-Methylchrysene <sup>14</sup>     | 3                                      |                                        |                           |                       |
| 97              | 5-Methylchrysene <sup>15, 14</sup> | 2B                                     | 1.10E-03                               |                           | 0.0006                |
| 98              | 6-Methylchrysene <sup>14</sup>     | 3                                      |                                        |                           | 0.007                 |
| 99              | Methyl ethyl ketone <sup>3</sup>   |                                        |                                        | 1000 (repro)              | 54.8                  |
| 100             | Methylamine <sup>14</sup>          |                                        |                                        |                           | 4.8                   |
| 101             | 2-Methylfluoranthene <sup>14</sup> | 3                                      |                                        |                           |                       |
| 102             | 3-Methylfluoranthene <sup>14</sup> | 3                                      |                                        |                           |                       |
| 103             | 1-Methylphenanthrene <sup>14</sup> | 3                                      |                                        |                           | 0.03                  |
| 104             | Methyl isocyanate <sup>14</sup>    |                                        |                                        |                           | 3.3                   |
| 105             | Methylpyrazines <sup>14</sup>      |                                        |                                        |                           | 1.2                   |
| 106             | 2-Methylpyridine <sup>14</sup>     |                                        |                                        |                           |                       |
| 107             | 3-Methylpyridine <sup>14</sup>     |                                        |                                        |                           |                       |

| <b>Chemical</b>                               | <b>IARC<br/>group*</b> | <b>Cal/EPA<br/>Cancer<br/>potency unit<br/>risk‡<br/>(<math>\mu\text{g}/\text{m}^3</math>)<sup>-1</sup></b> | <b>USEPA<br/>Cancer<br/>potency unit<br/>risk<br/>(<math>\mu\text{g}/\text{m}^3</math>)<sup>-1</sup></b> | <b>Non-cancer<br/>REL and<br/>target<br/>organ<br/>(<math>\mu\text{g}/\text{m}^3</math>)</b> | <b>Mainstream<br/>yields—ISO<br/>(<math>\mu\text{g}/\text{cigarette}</math>)</b> |
|-----------------------------------------------|------------------------|-------------------------------------------------------------------------------------------------------------|----------------------------------------------------------------------------------------------------------|----------------------------------------------------------------------------------------------|----------------------------------------------------------------------------------|
| 108 4-Methylpyridine <sup>14</sup>            |                        |                                                                                                             |                                                                                                          |                                                                                              |                                                                                  |
| 109 1-Methylpyrrolidine <sup>14</sup>         |                        |                                                                                                             |                                                                                                          |                                                                                              | 3                                                                                |
| 110 Nickel <sup>3</sup>                       | 1                      | 2.60E-04                                                                                                    | 2.40E-04                                                                                                 | 0.05<br><br>(resp/immun<br>e)                                                                | 0.011                                                                            |
| 111 Nicotine <sup>3</sup>                     |                        |                                                                                                             |                                                                                                          |                                                                                              | 810                                                                              |
| 112 Nitric oxide <sup>3</sup>                 |                        |                                                                                                             |                                                                                                          |                                                                                              | 37.7                                                                             |
| 113 Nitrogen dioxide <sup>14</sup>            |                        |                                                                                                             |                                                                                                          | 20 (resp)                                                                                    | 350                                                                              |
| 114 1-Nitro-N-butane <sup>14</sup>            |                        |                                                                                                             |                                                                                                          |                                                                                              | 0.80                                                                             |
| 115 Nitroethane <sup>14</sup>                 |                        |                                                                                                             |                                                                                                          |                                                                                              | 1.2                                                                              |
| 116 Nitromethane <sup>14</sup>                |                        |                                                                                                             |                                                                                                          |                                                                                              | 0.62                                                                             |
| 117 1-Nitro-N-pentane <sup>14</sup>           |                        |                                                                                                             |                                                                                                          |                                                                                              | 0.20                                                                             |
| 118 1-Nitropropane <sup>14</sup>              |                        |                                                                                                             |                                                                                                          |                                                                                              | 0.79                                                                             |
| 119 2-Nitropropane <sup>14</sup>              | 2B                     |                                                                                                             |                                                                                                          |                                                                                              | 0.97                                                                             |
| 120 N-Nitrosoanabasine<br>(NAB) <sup>14</sup> | 3                      |                                                                                                             |                                                                                                          |                                                                                              | 0.1                                                                              |
| 121 N-Nitrosoanatabine<br>(NAT) <sup>14</sup> | 3                      |                                                                                                             |                                                                                                          |                                                                                              | 1.9                                                                              |

| <b>Chemical</b>                                                                  | <b>IARC<br/>group*</b> | <b>Cal/EPA<br/>Cancer<br/>potency unit<br/>risk‡<br/>(<math>\mu\text{g}/\text{m}^3</math>)<sup>-1</sup></b> | <b>USEPA<br/>Cancer<br/>potency unit<br/>risk<br/>(<math>\mu\text{g}/\text{m}^3</math>)<sup>-1</sup></b> | <b>Non-cancer<br/>REL and<br/>target<br/>organ<br/>(<math>\mu\text{g}/\text{m}^3</math>)</b> | <b>Mainstream<br/>yields—ISO<br/>(<math>\mu\text{g}/\text{cigarette}</math>)</b> |
|----------------------------------------------------------------------------------|------------------------|-------------------------------------------------------------------------------------------------------------|----------------------------------------------------------------------------------------------------------|----------------------------------------------------------------------------------------------|----------------------------------------------------------------------------------|
| 122 4-N-Nitrosomethylamino)-<br>1-(3-pyridyl)-1-<br>butanone (NNK) <sup>14</sup> | 2B                     |                                                                                                             |                                                                                                          |                                                                                              | 0.39                                                                             |
| 123 N-Nitroso-N-<br>dibutylamine <sup>14</sup>                                   | 2B                     | 3.14E-03                                                                                                    | 1.60E-03                                                                                                 |                                                                                              | 0.012                                                                            |
| 124 N-Nitrosodiethanolamin<br>e <sup>13</sup>                                    | 2B                     | 8.00E-04                                                                                                    |                                                                                                          |                                                                                              | 0.03                                                                             |
| 125 N-Nitrosodiethylamine<br>(NDEA) <sup>13</sup>                                | 2A                     | 1.03E-02                                                                                                    | 4.30E-02                                                                                                 |                                                                                              | 0.0083                                                                           |
| 126 N-Nitrosodimethylamine<br>(NDMA) <sup>13</sup>                               | 2A                     | 4.57E-03                                                                                                    | 1.40E-02                                                                                                 |                                                                                              | 0.0244                                                                           |
| 127 N-Nitrosoethyl-<br>methylamine <sup>15</sup>                                 | 2B                     | 6.29E-03                                                                                                    |                                                                                                          |                                                                                              | 0.006                                                                            |

| <b>Chemical</b>                                | <b>IARC</b>   | <b>Cal/EPA</b>                                            | <b>USEPA</b>                                              | <b>Non-cancer Mainstream</b>                 |                                                    |
|------------------------------------------------|---------------|-----------------------------------------------------------|-----------------------------------------------------------|----------------------------------------------|----------------------------------------------------|
|                                                | <b>group*</b> | <b>Cancer</b>                                             | <b>Cancer</b>                                             | <b>REL and</b>                               | <b>yields—ISO</b>                                  |
|                                                |               | <b>potency unit</b>                                       | <b>potency unit</b>                                       | <b>target</b>                                | <b>(<math>\mu\text{g}/\text{cigarette}</math>)</b> |
|                                                |               | <b>risk‡</b>                                              | <b>risk</b>                                               | <b>organ</b>                                 |                                                    |
|                                                |               | <b>(<math>\mu\text{g}/\text{m}^3</math>)<sup>-1</sup></b> | <b>(<math>\mu\text{g}/\text{m}^3</math>)<sup>-1</sup></b> | <b>(<math>\mu\text{g}/\text{m}^3</math>)</b> |                                                    |
| 128 N-<br>Nitrosomorpholine <sup>14</sup>      | 2B            | 1.91E-03                                                  |                                                           |                                              |                                                    |
| 129 N-Nitrosornicotine<br>(NNN) <sup>13</sup>  | 2B            | 4.00E-04                                                  |                                                           |                                              | 1.9                                                |
| 130 N Nitrosopiperidine <sup>14</sup>          | 2B            | 2.69E-03                                                  |                                                           |                                              | 0.0045                                             |
| 131 N-Nitroso-N-<br>propylamine <sup>14</sup>  | 2B            | 2.00E-03                                                  |                                                           |                                              | 0.0005                                             |
| 132 N-Nitrosopyrrolidine<br>(NP) <sup>13</sup> | 2B            | 6.00E-03                                                  | 6.10E-04                                                  |                                              | 0.113                                              |
| 133 O-Cresol <sup>3</sup>                      |               |                                                           |                                                           | 4 (card)                                     | 5.7                                                |
| 134 Particulate matter                         |               |                                                           |                                                           |                                              |                                                    |
| 135 Perylene <sup>14</sup>                     | 3             |                                                           |                                                           |                                              | 0.004                                              |
| 136 Phenanthrene <sup>14</sup>                 | 3             |                                                           |                                                           |                                              | 0.35                                               |
| 137 Phenol <sup>3</sup>                        |               |                                                           |                                                           | 600                                          | 26.1                                               |
|                                                |               |                                                           |                                                           | (aliment/car                                 |                                                    |
|                                                |               |                                                           |                                                           | d/                                           |                                                    |
|                                                |               |                                                           |                                                           | kidney/nerv)                                 |                                                    |

| <b>Chemical</b>                            | <b>IARC<br/>group*</b> | <b>Cal/EPA<br/>Cancer<br/>potency unit<br/>risk‡<br/>(<math>\mu\text{g}/\text{m}^3</math>)<sup>-1</sup></b> | <b>USEPA<br/>Cancer<br/>potency unit<br/>risk<br/>(<math>\mu\text{g}/\text{m}^3</math>)<sup>-1</sup></b> | <b>Non-cancer<br/>REL and<br/>target<br/>organ<br/>(<math>\mu\text{g}/\text{m}^3</math>)</b> | <b>Mainstream<br/>yields—ISO<br/>(<math>\mu\text{g}/\text{cigarette}</math>)</b> |
|--------------------------------------------|------------------------|-------------------------------------------------------------------------------------------------------------|----------------------------------------------------------------------------------------------------------|----------------------------------------------------------------------------------------------|----------------------------------------------------------------------------------|
| 138 N-Phenyl-2-naphthylamine <sup>14</sup> | 3                      |                                                                                                             |                                                                                                          |                                                                                              |                                                                                  |
| 139 Polonium-210 <sup>13</sup>             |                        |                                                                                                             |                                                                                                          |                                                                                              |                                                                                  |
| 140 Propionaldehyde <sup>3</sup>           |                        |                                                                                                             |                                                                                                          |                                                                                              | 49.8                                                                             |
| 141 Propylene <sup>14</sup>                |                        |                                                                                                             |                                                                                                          |                                                                                              | 75                                                                               |
| 142 Pyrene <sup>14</sup>                   | 3                      |                                                                                                             |                                                                                                          |                                                                                              | 0.13                                                                             |
| 143 Pyridine <sup>3</sup>                  | 3                      |                                                                                                             |                                                                                                          |                                                                                              | 11.8                                                                             |
| 144 Pyrrole <sup>17</sup>                  |                        |                                                                                                             |                                                                                                          |                                                                                              |                                                                                  |
| 145 Pyrrolidine <sup>14</sup>              |                        |                                                                                                             |                                                                                                          |                                                                                              | 0.16                                                                             |
| 146 Resorcinol <sup>14</sup>               |                        |                                                                                                             |                                                                                                          |                                                                                              | 44                                                                               |
| 147 Quinoline <sup>3</sup>                 |                        |                                                                                                             |                                                                                                          |                                                                                              | 0.356                                                                            |
| 148 Selenium <sup>14</sup>                 | 3                      |                                                                                                             |                                                                                                          | 0.08 (resp)                                                                                  |                                                                                  |
| 149 Styrene <sup>3</sup>                   | 2B                     |                                                                                                             |                                                                                                          | 1000 (nerv)                                                                                  | 5.71                                                                             |
| 150 Succinic anhydride <sup>14</sup>       |                        |                                                                                                             |                                                                                                          |                                                                                              |                                                                                  |
| 151 Toluene <sup>3</sup>                   |                        |                                                                                                             |                                                                                                          | 400<br>(dev/nerv/<br>aliment)                                                                | 72.8                                                                             |
| 152 2-Toluidine <sup>13</sup>              | 2A                     |                                                                                                             |                                                                                                          |                                                                                              | 0.115                                                                            |

| <b>Chemical</b>                  | <b>IARC group*</b> | <b>Cal/EPA Cancer potency unit risk‡<br/>(<math>\mu\text{g}/\text{m}^3</math>)<sup>-1</sup></b> | <b>USEPA Cancer potency unit risk<br/>(<math>\mu\text{g}/\text{m}^3</math>)<sup>-1</sup></b> | <b>Non-cancer REL and target organ<br/>Mainstream yields—ISO<br/>(<math>\mu\text{g}/\text{cigarette}</math>)<br/>(<math>\mu\text{g}/\text{m}^3</math>)</b> |
|----------------------------------|--------------------|-------------------------------------------------------------------------------------------------|----------------------------------------------------------------------------------------------|------------------------------------------------------------------------------------------------------------------------------------------------------------|
| 153 Trimethylamine <sup>14</sup> |                    |                                                                                                 |                                                                                              | 0.7                                                                                                                                                        |
| 154 Triphenylene <sup>14</sup>   | 3                  |                                                                                                 |                                                                                              |                                                                                                                                                            |
| 155 Urethane <sup>19</sup>       | 2B                 | 2.86E-04                                                                                        |                                                                                              | 0.029                                                                                                                                                      |
| 156 Vinyl acetate <sup>20</sup>  | 2B                 |                                                                                                 |                                                                                              | 200 (resp)                                                                                                                                                 |
| 157 Vinyl chloride <sup>14</sup> | 1                  | 7.80E-05                                                                                        | 4.40E-06                                                                                     | 0.0086                                                                                                                                                     |
| 158 Xylenes <sup>17</sup>        |                    |                                                                                                 |                                                                                              | 200<br>(nerv/resp)                                                                                                                                         |

†1, known human carcinogens; 2A, probable human carcinogens; 2B, possible human carcinogens; 3, unclassifiable as a human carcinogen

‡Unit risks are those reported by the California EPA [www.oehha.ca.gov](http://www.oehha.ca.gov), or the USEPA [www.epa.gov/iris](http://www.epa.gov/iris). [5, 11] The non-cancer RELs and RfDs from Cal/EPA and USEPA are identical with the exception of benzene and arsenic.

The values from reference[3] were obtained through taking the average yield from 11 leading brands reported on the British Columbia Ministry of Health website in 2000.

Brands included: du Maurier King Size; du Maurier Light King Size; du Maurier Regular; Player's Regular; Player's Light Regular; Player's Extra Light Regular; Player's Light King Size; Matinee Extra Mild King Size; Rothman's King Size; Export A Regular; Export A Light Regular.

§this potency is presented but was not used in the final analysis as dioxins were assumed to not be non-threshold carcinogens and inappropriate for the current analysis resp, respiratory system; repro/dev, reproductive or developmental processes; aliment, alimentary system (GI tract, liver); immune, immune system; card, cardiovascular system; nerv, nervous system; end, endocrine system
